# Supplementary material for: Psychometric evaluation of the NTDT-PRO questionnaire for assessing symptoms in patients with non-transfusion-dependent beta-thalassaemia
Source: PubMed Central journal article supplement — BMJ Open. 2023 Mar 21;13(3):e066683. doi: 10.1136/bmjopen-2022-066683 (PMC10040027; doi:10.1136/bmjopen-2022-066683), 2023-03-21
Supplement: bmjopen-2022-066683supp001.pdf [file bmjopen-2022-066683supp001.pdf]

## SUPPLEMENTARY MATERIALS

TABLE S1 ALGORITHM FOR MAPPING PRO ASSESSMENTS TO NOMINAL WEEKS

|             | Nominal week | NTDT-PRO        | FACIT-F/SF-36v2®/PGI-C                                               |
|-------------|--------------|-----------------|----------------------------------------------------------------------|
| Baseline    | 0            | Days -7 to -1   | Day of dosing of the first dose of study drug (screening if missing) |
| Weeks 1–12  | 1            | Days 1 to 7     | None                                                                 |
|             | 2            | Days 8 to 14    | None                                                                 |
|             | 3            | Days 15 to 21   | None                                                                 |
|             | 4            | Days 22 to 28   | None                                                                 |
|             | 5            | Days 29 to 35   | None                                                                 |
|             | 6            | Days 36 to 42   | Days 22 to 63                                                        |
|             | 7            | Days 43 to 49   | None                                                                 |
|             | 8            | Days 50 to 56   | None                                                                 |
|             | 9            | Days 57 to 63   | None                                                                 |
|             | 10           | Days 64 to 70   | None                                                                 |
|             | 11           | Days 71 to 77   | None                                                                 |
|             | 12           | Days 78 to 84   | Days 64 to 105                                                       |
| Weeks 13–24 | 13           | Days 85 to 91   | None                                                                 |
|             | 14           | Days 92 to 98   | None                                                                 |
|             | 15           | Days 99 to 105  | None                                                                 |
|             | 16           | Days 106 to 112 | None                                                                 |
|             | 17           | Days 113 to 119 | None                                                                 |
|             | 18           | Days 120 to 126 | Days 106 to 147                                                      |
|             | 19           | Days 127 to 133 | None                                                                 |
|             | 20           | Days 134 to 140 | None                                                                 |
|             | 21           | Days 141 to 147 | None                                                                 |
|             | 22           | Days 148 to 154 | None                                                                 |
|             | 23           | Days 155 to 161 | None                                                                 |
|             | 24           | Days 162 to 168 | Days 148 to 189                                                      |

FACIT-F, Functional Assessment of Chronic Illness Therapy – Fatigue; NTDT, non-transfusion-dependent  $\beta$ -thalassaemia; PRO, patient-reported outcomes; SF-36v2®, Short Form Health Survey version 2.

Table S2 Known-groups validity at week 24

|                                                | n  | NTDT-PRO T/W domain |            |                      | NTDT-PRO SoB domain |             |                      |
|------------------------------------------------|----|---------------------|------------|----------------------|---------------------|-------------|----------------------|
|                                                |    | LS mean             | 95% CI     | p value <sup>a</sup> | LS mean             | 95% CI      | p value <sup>a</sup> |
| <b>FACIT-F FS</b>                              |    |                     |            | <0.001               |                     |             | <0.001               |
| Very severe ( $\leq 37$ )                      | 62 | 4.04                | 3.39, 4.69 |                      | 3.67                | 2.99, 4.36  |                      |
| Severe (>37 to 40)                             | 16 | 2.63                | 1.61, 3.65 |                      | 2.14                | 1.06, 3.22  |                      |
| Moderate (>40 to 43)                           | 18 | 2.52                | 1.59, 3.45 |                      | 2.50                | 1.52, 3.48  |                      |
| Mild (>43 to 46)                               | 17 | 2.31                | 1.40, 3.23 |                      | 2.01                | 1.04, 2.98  |                      |
| Very mild/no symptoms (>46)                    | 31 | 1.05                | 0.27, 1.82 |                      | 0.62                | -0.21, 1.44 |                      |
| <b>FACIT-F item HI12<sup>b</sup></b>           |    |                     |            | <0.001               |                     |             | <0.001               |
| Very much (0)                                  | 3  | 6.57                | 4.68, 8.46 |                      | 4.93                | 2.79, 7.07  |                      |
| Quite a bit (1)                                | 10 | 4.44                | 3.39, 5.49 |                      | 3.85                | 2.67, 5.04  |                      |
| Somewhat (2)                                   | 16 | 3.29                | 2.45, 4.12 |                      | 3.39                | 2.44, 4.33  |                      |
| A little bit (3)                               | 40 | 2.77                | 2.20, 3.34 |                      | 2.36                | 1.72, 3.00  |                      |
| Not at all (4)                                 | 27 | 1.23                | 0.55, 1.92 |                      | 0.93                | 0.16, 1.71  |                      |
| <b>FACIT-F item An2<sup>b</sup></b>            |    |                     |            | <0.001               |                     |             | 0.002                |
| Very much (0)                                  | 3  | 6.62                | 4.57, 8.68 |                      | 4.92                | 2.68, 7.17  |                      |
| Quite a bit (1)                                | 11 | 4.08                | 3.01, 5.16 |                      | 3.41                | 2.23, 4.58  |                      |
| Somewhat (2)                                   | 15 | 3.36                | 2.45, 4.27 |                      | 3.59                | 2.59, 4.58  |                      |
| A little bit (3)                               | 48 | 2.34                | 1.76, 2.93 |                      | 1.96                | 1.32, 2.60  |                      |
| Not at all (4)                                 | 19 | 1.78                | 0.91, 2.65 |                      | 1.31                | 0.36, 2.26  |                      |
| <b>SF-36v2<sup>®</sup> vitality</b>            |    |                     |            | <0.001               |                     |             | <0.001               |
| Very poor ( $\leq 36.6$ )                      | 7  | 5.37                | 4.07, 6.67 |                      | 4.53                | 3.10, 5.96  |                      |
| Poor (>36.6 to 43.3)                           | 11 | 4.45                | 3.41, 5.49 |                      | 4.04                | 2.90, 5.18  |                      |
| Normal (>43.3 to 56.7)                         | 41 | 2.98                | 2.40, 3.56 |                      | 2.79                | 2.15, 3.43  |                      |
| Better (>56.7 to 63.4)                         | 29 | 1.72                | 1.05, 2.39 |                      | 1.25                | 0.51, 1.98  |                      |
| Much better (>63.4)                            | 8  | 1.56                | 0.31, 2.80 |                      | 1.48                | 0.11, 2.84  |                      |
| <b>SF-36v2<sup>®</sup> item 9e<sup>c</sup></b> |    |                     |            | <0.001               |                     |             | 0.001                |
| All of the time (1)                            | 3  | 3.13                | 1.10, 5.17 |                      | 1.55                | -0.72, 3.82 |                      |
| Most of the time (2)                           | 40 | 1.79                | 1.20, 2.39 |                      | 1.58                | 0.92, 2.25  |                      |
| Some of the time (3)                           | 30 | 2.99                | 2.34, 3.64 |                      | 2.76                | 2.03, 3.48  |                      |
| A little of the time (4)                       | 15 | 4.06                | 3.12, 5.00 |                      | 3.51                | 2.47, 4.56  |                      |
| None of the time (5)                           | 8  | 5.13                | 3.88, 6.39 |                      | 4.44                | 3.04, 5.85  |                      |
| <b>SF-36v2<sup>®</sup> item 9g<sup>c</sup></b> |    |                     |            | <0.001               |                     |             | <0.001               |
| All of the time (1)                            | 5  | 5.67                | 4.24, 7.09 |                      | 4.67                | 3.11, 6.24  |                      |
| Most of the time (2)                           | 4  | 5.03                | 3.35, 6.71 |                      | 4.58                | 2.74, 6.43  |                      |
| Some of the time (3)                           | 18 | 3.79                | 3.01, 4.58 |                      | 3.57                | 2.71, 4.43  |                      |
| A little of the time (4)                       | 44 | 2.62                | 2.07, 3.16 |                      | 2.37                | 1.77, 2.97  |                      |
| None of the time (5)                           | 25 | 1.20                | 0.51, 1.90 |                      | 0.78                | 0.02, 1.54  |                      |
| <b>SF-36v2<sup>®</sup> item 9i<sup>c</sup></b> |    |                     |            | <0.001               |                     |             | <0.001               |
| All of the time (1)                            | 3  | 6.20                | 4.23, 8.17 |                      | 6.47                | 4.30, 8.64  |                      |
| Most of the time (2)                           | 17 | 4.36                | 3.53, 5.19 |                      | 3.56                | 2.64, 4.47  |                      |
| Some of the time (3)                           | 25 | 2.77                | 2.03, 3.50 |                      | 2.53                | 1.72, 3.34  |                      |
| A little of the time (4)                       | 44 | 1.99                | 1.42, 2.56 |                      | 1.76                | 1.14, 2.39  |                      |
| None of the time (5)                           | 7  | 1.58                | 0.25, 2.91 |                      | 1.49                | 0.02, 2.96  |                      |

|                      | n  | NTDT-PRO T/W domain |            |                      | NTDT-PRO SoB domain |            |                      |
|----------------------|----|---------------------|------------|----------------------|---------------------|------------|----------------------|
|                      |    | LS mean             | 95% CI     | p value <sup>a</sup> | LS mean             | 95% CI     | p value <sup>a</sup> |
| PGI-S                |    |                     |            | <0.001               |                     |            | <0.001               |
| 0 to 2 (no symptoms) | 43 | 1.13                | 0.72, 1.54 |                      | 0.93                | 0.37, 1.48 |                      |
| >2 to 4 (mild)       | 33 | 3.43                | 2.97, 3.89 |                      | 3.32                | 2.69, 3.94 |                      |
| >4 to 6 (moderate)   | 21 | 4.31                | 3.70, 4.91 |                      | 3.63                | 2.82, 4.44 |                      |
| >6 to 8 (severe)     | 11 | 5.60                | 4.85, 6.34 |                      | 4.99                | 3.99, 6.00 |                      |
| >8 (very severe)     | 2  | 6.81                | 5.07, 8.55 |                      | 4.34                | 1.99, 6.69 |                      |

<sup>a</sup>F-test comparing T/W and SoB domain scores across subgroups (ANCOVA).

<sup>b</sup>“Please select 1 answer [...] to indicate your response as it applies to the past 7 days”: item HI12, “I feel weak all over”; item An2, “I feel tired”.

<sup>c</sup>“How much of the time during the past week did you...”: item 9e, “...have a lot of energy?”; item 9g, “...feel worn out?”; item 9i, “...feel tired?”

ANCOVA, analysis of covariance; CI, confidence interval; FACIT-F, Functional Assessment of Chronic Illness Therapy – Fatigue; FS, Fatigue Subscale; LS, least squares; PGI-S, Patient Global Impression of Severity; SF-36v2<sup>®</sup>, Short Form Health Survey version 2; SoB, Shortness of Breath; T/W, Tiredness/Weakness.

**Table S3** Demographics and baseline clinical characteristics

| Characteristic                                                                                             | N=145               |
|------------------------------------------------------------------------------------------------------------|---------------------|
| Age (years)                                                                                                |                     |
| Mean (SD)                                                                                                  | 39.9 (12.8)         |
| Median (range)                                                                                             | 40 (18 to 71)       |
| Female, n (%)                                                                                              | 82 (56.6)           |
| Race, n (%)                                                                                                |                     |
| Asian                                                                                                      | 44 (30.3)           |
| White                                                                                                      | 87 (60.0)           |
| Other                                                                                                      | 14 (9.7)            |
| Ethnicity, n (%)                                                                                           |                     |
| Hispanic or Latino                                                                                         | 3 (2.1)             |
| Not Hispanic or Latino                                                                                     | 142 (97.9)          |
| Body mass index (kg/m <sup>2</sup> ), n (%)                                                                |                     |
| <20                                                                                                        | 53 (36.6)           |
| 20 to <25                                                                                                  | 66 (45.5)           |
| 25 to <30                                                                                                  | 21 (14.5)           |
| ≥30                                                                                                        | 5 (3.5)             |
| Geographic region, n (%)                                                                                   |                     |
| North America and Europe                                                                                   | 90 (62.1)           |
| Middle East                                                                                                | 17 (11.7)           |
| Asia Pacific                                                                                               | 38 (26.2)           |
| β-thalassaemia diagnosis, n (%)                                                                            |                     |
| β-thalassaemia                                                                                             | 97 (66.9)           |
| Haemoglobin E/β-thalassaemia                                                                               | 39 (26.9)           |
| β-thalassaemia plus α-thalassaemia                                                                         | 9 (6.2)             |
| Baseline haemoglobin level (g/dL)                                                                          |                     |
| Mean (SD)                                                                                                  | 8.2 (1.2)           |
| Median (range)                                                                                             | 8.2 (7.3 to 9.2)    |
| Categories of baseline haemoglobin level, n (%)                                                            |                     |
| ≥8.5 g/dL                                                                                                  | 60 (41.4)           |
| <8.5 g/dL                                                                                                  | 85 (58.6)           |
| Baseline transfusion burden (units of red blood cells in the 24 weeks before the first dose of study drug) |                     |
| Mean (SD)                                                                                                  | 0.3 (0.9)           |
| Median (range)                                                                                             | 0 (0 to 6)          |
| 6-minute walk test, n (%)                                                                                  |                     |
| ≤450 m                                                                                                     | 82 (56.6)           |
| >450 m                                                                                                     | 63 (43.4)           |
| Left ventricular ejection fraction (%)                                                                     |                     |
| Mean (SD)                                                                                                  | 65.6 (5.5)          |
| Median (range)                                                                                             | 65.0 (55.4 to 79.0) |
| Tricuspid valve regurgitation velocity, n (%)                                                              |                     |
| ≤2.8 m/s (low probability of pulmonary hypertension)                                                       | 111 (76.6)          |
| >3.4 m/s (high probability of pulmonary hypertension)                                                      | 1 (0.7)             |
| ECOG performance status, n (%)                                                                             |                     |
| 0                                                                                                          | 100 (69.0)          |
| 1                                                                                                          | 45 (31.0)           |

ECOG, Eastern Cooperative Oncology Group; SD, standard deviation.

**Table S4** Completeness of NTDT-PRO item entry at baseline and week 24

| Number of days with missing NTDT-PRO data <sup>a</sup> | n (%)            |                 |
|--------------------------------------------------------|------------------|-----------------|
|                                                        | Baseline (N=145) | Week 24 (N=128) |
| 0                                                      | 56 (38.6)        | 51 (39.8)       |
| 1                                                      | 44 (30.3)        | 31 (24.2)       |
| 2                                                      | 24 (16.6)        | 20 (15.6)       |
| 3                                                      | 19 (13.1)        | 6 (4.7)         |
| 4                                                      | 1 (0.7)          | 10 (7.8)        |
| 5                                                      | 1 (0.7)          | 7 (5.5)         |
| 6                                                      | 0                | 3 (2.3)         |
| 7                                                      | 0                | 0               |

<sup>a</sup>There was no item-level missing data (participants either completed all 6 NTDT-PRO items or none of them).

NTDT-PRO, non-transfusion-dependent  $\beta$ -thalassaemia-patient-reported outcomes.

**Table S5** Baseline PRO score distributions

|                            | Mean (SD)    | Median (Q1, Q3)      | Range         | Skewness | Kurtosis | Floor effect (%) <sup>a</sup> | Ceiling effect (%) <sup>b</sup> |
|----------------------------|--------------|----------------------|---------------|----------|----------|-------------------------------|---------------------------------|
| <b>NTDT-PRO</b>            |              |                      |               |          |          |                               |                                 |
| Item 1-TiredNA             | 3.2 (2.2)    | 3.0 (1.5, 4.8)       | 0.0 to 9.0    | 0.2      | -0.6     | 11.7                          | 0.0                             |
| Item 2-TiredPA             | 5.0 (2.5)    | 5.2 (3.4, 7.0)       | 0.0 to 10.0   | -0.3     | -0.7     | 1.4                           | 2.1                             |
| Item 3-WeakNA              | 3.1 (2.2)    | 3.0 (1.3, 4.8)       | 0.0 to 9.3    | 0.3      | -0.5     | 11.7                          | 0.7                             |
| Item 4-WeakPA              | 4.9 (2.6)    | 5.0 (3.0, 7.0)       | 0.0 to 10.0   | -0.2     | -0.8     | 2.8                           | 2.1                             |
| Item 5-SobNA               | 2.4 (2.1)    | 2.2 (0.3, 4.0)       | 0.0 to 8.9    | 0.7      | -0.2     | 20.7                          | 0.0                             |
| Item 6-SobPA               | 4.2 (2.7)    | 4.4 (2.0, 6.4)       | 0.0 to 10.0   | 0.1      | -1.0     | 7.6                           | 2.8                             |
| T/W domain (items 1 to 4)  | 4.1 (2.2)    | 4.3 (2.5, 5.7)       | 0.0 to 9.5    | 0.0      | -0.6     | 1.4                           | 1.4                             |
| SoB domain (items 5 and 6) | 3.3 (2.3)    | 3.4 (1.2, 5.1)       | 0.0 to 9.4    | 0.2      | -0.8     | 7.6                           | 0.7                             |
| PGI-S                      | 3.7 (2.4)    | 3.8 (1.8, 5.4)       | 0.0 to 9.5    | 0.1      | -0.8     |                               |                                 |
| <b>SF-36v2<sup>®</sup></b> |              |                      |               |          |          |                               |                                 |
| Physical functioning       | 47.7 (7.7)   | 48.0 (44.2, 53.7)    | 23.1 to 57.5  | -0.8     | 0.2      | -                             | -                               |
| Role-physical              | 47.6 (7.8)   | 48.2 (41.4, 54.9)    | 25.7 to 57.2  | -0.4     | -0.7     | -                             | -                               |
| Bodily pain                | 51.5 (9.2)   | 51.5 (42.6, 62.0)    | 30.6 to 62.0  | -0.3     | -1.1     | -                             | -                               |
| General health             | 42.2 (10.2)  | 41.3 (34.2, 50.8)    | 19.0 to 66.5  | 0.1      | -0.6     | -                             | -                               |
| Vitality                   | 49.2 (10.6)  | 49.6 (40.7, 58.5)    | 25.9 to 70.4  | -0.3     | -0.9     | -                             | -                               |
| Social functioning         | 46.7 (9.3)   | 47.3 (37.3, 57.3)    | 22.3 to 57.3  | -0.5     | -0.8     | -                             | -                               |
| Role-emotional             | 46.6 (8.8)   | 49.2 (38.8, 52.7)    | 17.9 to 56.2  | -0.7     | -0.4     | -                             | -                               |
| Mental health              | 47.2 (9.6)   | 48.3 (40.4, 56.1)    | 24.7 to 64.0  | -0.5     | -0.6     | -                             | -                               |
| PCS                        | 48.0 (7.1)   | 48.8 (43.1, 53.3)    | 28.4 to 63.6  | -0.4     | -0.1     | -                             | -                               |
| MCS                        | 46.9 (9.2)   | 47.7 (40.6, 53.9)    | 23.3 to 63.1  | -0.5     | -0.4     | -                             | -                               |
| <b>FACIT-F</b>             |              |                      |               |          |          |                               |                                 |
| Physical well-being        | 22.9 (3.9)   | 24.0 (20.0, 26.0)    | 11.0 to 28.0  | -0.8     | 0.0      | -                             | -                               |
| Social/family well-being   | 19.4 (5.3)   | 20.0 (16.3, 23.0)    | 4.7 to 28.0   | -0.4     | -0.5     | -                             | -                               |
| Emotional well-being       | 18.2 (3.5)   | 19.0 (16.0, 21.0)    | 8.0 to 24.0   | -0.6     | -0.4     | -                             | -                               |
| Functional well-being      | 18.0 (5.4)   | 18.0 (14.0, 22.0)    | 3.0 to 28.0   | 0.0      | -0.6     | -                             | -                               |
| FACT-G total score         | 78.4 (14.6)  | 80.0 (67.0, 90.3)    | 42.0 to 105.8 | -0.1     | -0.7     | -                             | -                               |
| FACIT-F FS                 | 36.4 (9.9)   | 39.0 (29.0, 44.5)    | 1.0 to 51.0   | -0.7     | 0.0      | -                             | -                               |
| FACIT-F TOI                | 77.2 (17.2)  | 81.0 (64.0, 91.0)    | 29.0 to 105.0 | -0.4     | -0.7     | -                             | -                               |
| FACIT-F total score        | 114.8 (22.8) | 118.5 (100.0, 133.2) | 62.0 to 155.8 | -0.3     | -0.7     | -                             | -                               |

<sup>a</sup>Score of 0.

<sup>b</sup>Score of >9.

FACIT-F, Functional Assessment of Chronic Illness Therapy – Fatigue; FACT-G, Functional Assessment of Cancer Therapy – General; FS, Fatigue Subscale; MCS, Mental Component Summary; PCS, Physical Component Summary; PGI-S, Patient Global Impression of Severity; PRO, patient-reported outcome; Q1, first quartile; Q3, third quartile; SD, standard deviation; SF-36v2<sup>®</sup>, Short Form Health Survey version 2; SoB, Shortness of Breath; SobNA, shortness of breath not doing physical activity; SobPA, shortness of breath doing physical activity; TiredNA, tiredness not doing physical activity; TiredPA, tiredness doing physical activity; TOI, trial outcome index; T/W, Tiredness/Weakness; WeakNA, weakness not doing physical activity; WeakPA, weakness doing physical activity.

**Table S6** Variability of weekly NTDT-PRO item scores across missing day scenarios

|                |                             | Number of missing days |       |       |       |       |       |       |
|----------------|-----------------------------|------------------------|-------|-------|-------|-------|-------|-------|
|                |                             | 0                      | 1     | 2     | 3     | 4     | 5     | 6     |
| Item 1-TiredNA | Mean                        | 2.36                   | 2.36  | 2.37  | 2.39  | 2.31  | 2.33  | 2.30  |
|                | SD                          | 1.913                  | 1.913 | 1.917 | 1.908 | 1.930 | 1.931 | 1.947 |
|                | <i>p</i> value <sup>a</sup> | –                      | 0.971 | 0.949 | 0.971 | 0.962 | 0.869 | 0.962 |
| Item 2-TiredPA | Mean                        | 4.44                   | 4.44  | 4.44  | 4.42  | 4.46  | 4.44  | 4.45  |
|                | SD                          | 2.315                  | 2.319 | 2.308 | 2.316 | 2.328 | 2.352 | 2.338 |
|                | <i>p</i> value <sup>a</sup> | –                      | 1.000 | 0.953 | 0.970 | 0.978 | 0.827 | 0.873 |
| Item 3-WeakNA  | Mean                        | 2.60                   | 2.60  | 2.61  | 2.61  | 2.59  | 2.58  | 2.60  |
|                | SD                          | 1.879                  | 1.872 | 1.872 | 1.877 | 1.895 | 1.917 | 1.961 |
|                | <i>p</i> value <sup>a</sup> | –                      | 0.941 | 0.930 | 0.955 | 0.888 | 0.786 | 0.576 |
| Item 4-WeakPA  | Mean                        | 4.42                   | 4.42  | 4.42  | 4.40  | 4.44  | 4.43  | 4.44  |
|                | SD                          | 2.378                  | 2.381 | 2.392 | 2.396 | 2.365 | 2.369 | 2.416 |
|                | <i>p</i> value <sup>a</sup> | –                      | 0.997 | 0.973 | 0.892 | 0.871 | 0.965 | 0.764 |
| Item 5-SobNA   | Mean                        | 2.02                   | 2.02  | 2.01  | 2.03  | 2.01  | 2.05  | 2.05  |
|                | SD                          | 1.894                  | 1.892 | 1.884 | 1.911 | 1.884 | 1.939 | 1.928 |
|                | <i>p</i> value <sup>a</sup> | –                      | 0.997 | 0.940 | 0.911 | 0.945 | 0.772 | 0.788 |
| Item 6-SobPA   | Mean                        | 3.76                   | 3.77  | 3.75  | 3.76  | 3.76  | 3.79  | 3.74  |
|                | SD                          | 2.547                  | 2.546 | 2.546 | 2.555 | 2.548 | 2.566 | 2.596 |
|                | <i>p</i> value <sup>a</sup> | –                      | 0.982 | 0.970 | 0.958 | 0.993 | 0.859 | 0.849 |

The mean and SD were calculated by first calculating the average score across all weeks for each participant and then calculating the mean and SD across participants.

<sup>a</sup>Brown–Forsythe test comparing SD values for individual missing day scenarios with the SD when 0 days were missing.

NTDT-PRO, non-transfusion-dependent  $\beta$ -thalassaemia-patient-reported outcomes; SD, standard deviation; SobNA, shortness of breath not doing physical activity; SobPA, shortness of breath doing physical activity; TiredNA, tiredness not doing physical activity; TiredPA, tiredness doing physical activity; WeakNA, weakness not doing physical activity; WeakPA, weakness doing physical activity.



**Table S7** NTDT-PRO internal consistency reliability

|             | Domain | Cronbach's alpha | Deleted item <sup>a</sup> | Cronbach's alpha |      |
|-------------|--------|------------------|---------------------------|------------------|------|
| Baseline    | T/W    | 0.95             |                           |                  |      |
|             |        |                  | Item 1-TiredNA            | 0.93             |      |
|             |        |                  |                           | Item 2-TiredPA   | 0.94 |
|             |        |                  |                           | Item 3-WeakNA    | 0.94 |
|             |        |                  |                           | Item 4-WeakPA    | 0.94 |
|             | SoB    | 0.89             |                           |                  |      |
| Week 24     | T/W    | 0.94             |                           |                  |      |
|             |        |                  | Item 1-TiredNA            | 0.92             |      |
|             |        |                  |                           | Item 2-TiredPA   | 0.92 |
|             |        |                  |                           | Item 3-WeakNA    | 0.92 |
|             |        |                  |                           | Item 4-WeakPA    | 0.92 |
|             | SoB    | 0.85             |                           |                  |      |
| Weeks 13–24 | T/W    | 0.95             |                           |                  |      |
|             |        |                  | Item 1-TiredNA            | 0.93             |      |
|             |        |                  |                           | Item 2-TiredPA   | 0.93 |
|             |        |                  |                           | Item 3-WeakNA    | 0.93 |
|             |        |                  |                           | Item 4-WeakPA    | 0.93 |
|             | SoB    | 0.84             |                           |                  |      |

<sup>a</sup>The effect of removing individual items could not be evaluated for the SoB domain, because it consists of only 2 items.

NTDT-PRO, non-transfusion-dependent  $\beta$ -thalassaemia-patient-reported outcomes; SoB, Shortness of Breath; TiredNA, tiredness not doing physical activity; TiredPA, tiredness doing physical activity; WeakNA, weakness not doing physical activity; WeakPA, weakness doing physical activity; T/W, Tiredness/Weakness.

**Table S8** Known-groups validity at baseline

|                                                | n  | NTDT-PRO T/W domain |            |                      | NTDT-PRO SoB domain |             |                      |
|------------------------------------------------|----|---------------------|------------|----------------------|---------------------|-------------|----------------------|
|                                                |    | LS mean             | 95% CI     | p value <sup>a</sup> | LS mean             | 95% CI      | p value <sup>a</sup> |
| <b>FACIT-F FS</b>                              |    |                     |            | <0.001               |                     |             | <0.001               |
| Very severe ( $\leq 37$ )                      | 62 | 5.27                | 4.84, 5.71 |                      | 4.35                | 3.79, 4.91  |                      |
| Severe ( $>37$ to 40)                          | 16 | 3.06                | 2.33, 3.80 |                      | 3.30                | 2.36, 4.24  |                      |
| Moderate ( $>40$ to 43)                        | 18 | 3.16                | 2.45, 3.86 |                      | 2.84                | 1.93, 3.75  |                      |
| Mild ( $>43$ to 46)                            | 17 | 2.94                | 2.21, 3.68 |                      | 1.74                | 0.79, 2.68  |                      |
| Very mild/no symptoms ( $>46$ )                | 31 | 1.59                | 1.05, 2.13 |                      | 1.13                | 0.44, 1.83  |                      |
| <b>FACIT-F item HI12<sup>b</sup></b>           |    |                     |            | <0.001               |                     |             | <0.001               |
| Very much (0)                                  | 3  | 7.11                | 5.47, 8.75 |                      | 6.23                | 4.10, 8.36  |                      |
| Quite a bit (1)                                | 25 | 5.76                | 5.16, 6.35 |                      | 4.80                | 4.03, 5.57  |                      |
| Somewhat (2)                                   | 24 | 4.69                | 4.04, 5.34 |                      | 4.06                | 3.22, 4.90  |                      |
| A little bit (3)                               | 54 | 3.58                | 3.18, 3.99 |                      | 3.08                | 2.55, 3.60  |                      |
| Not at all (4)                                 | 38 | 1.71                | 1.23, 2.18 |                      | 1.15                | 0.54, 1.77  |                      |
| <b>FACIT-F item An2<sup>b</sup></b>            |    |                     |            | <0.001               |                     |             | <0.001               |
| Very much (0)                                  | 3  | 7.87                | 6.21, 9.54 |                      | 8.02                | 5.91, 10.13 |                      |
| Quite a bit (1)                                | 25 | 5.87                | 5.26, 6.48 |                      | 4.89                | 4.11, 5.66  |                      |
| Somewhat (2)                                   | 37 | 4.31                | 3.79, 4.83 |                      | 3.90                | 3.24, 4.56  |                      |
| A little bit (3)                               | 59 | 3.08                | 2.68, 3.48 |                      | 2.31                | 1.80, 2.82  |                      |
| Not at all (4)                                 | 20 | 1.43                | 0.79, 2.08 |                      | 1.26                | 0.44, 2.08  |                      |
| <b>SF-36v2<sup>®</sup> vitality</b>            |    |                     |            | <0.001               |                     |             | <0.001               |
| Very poor ( $\leq 36.6$ )                      | 20 | 6.14                | 5.43, 6.84 |                      | 5.57                | 4.66, 6.48  |                      |
| Poor ( $>36.6$ to 43.3)                        | 19 | 5.42                | 4.70, 6.15 |                      | 4.11                | 3.17, 5.05  |                      |
| Normal ( $>43.3$ to 56.7)                      | 64 | 3.73                | 3.32, 4.13 |                      | 3.15                | 2.63, 3.68  |                      |
| Better ( $>56.7$ to 63.4)                      | 25 | 2.09                | 1.48, 2.69 |                      | 1.73                | 0.95, 2.51  |                      |
| Much better ( $>63.4$ )                        | 13 | 1.71                | 0.90, 2.52 |                      | 1.12                | 0.07, 2.17  |                      |
| <b>SF-36v2<sup>®</sup> item 9e<sup>c</sup></b> |    |                     |            | <0.001               |                     |             | <0.001               |
| All of the time (1)                            | 11 | 2.09                | 1.14, 3.04 |                      | 1.17                | -0.02, 2.37 |                      |
| Most of the time (2)                           | 33 | 2.21                | 1.64, 2.77 |                      | 1.95                | 1.24, 2.65  |                      |
| Some of the time (3)                           | 46 | 3.79                | 3.27, 4.31 |                      | 3.24                | 2.59, 3.89  |                      |
| A little of the time (4)                       | 37 | 5.12                | 4.52, 5.73 |                      | 4.18                | 3.42, 4.93  |                      |
| None of the time (5)                           | 14 | 5.80                | 4.91, 6.70 |                      | 5.06                | 3.94, 6.19  |                      |
| <b>SF-36v2<sup>®</sup> item 9g<sup>c</sup></b> |    |                     |            | <0.001               |                     |             | <0.001               |
| All of the time (1)                            | 1  | 6.64                | 3.62, 9.66 |                      | 5.74                | 2.00, 9.47  |                      |
| Most of the time (2)                           | 24 | 5.67                | 5.02, 6.32 |                      | 4.79                | 3.99, 5.59  |                      |
| Some of the time (3)                           | 39 | 4.43                | 3.92, 4.93 |                      | 3.97                | 3.35, 4.60  |                      |
| A little of the time (4)                       | 41 | 2.78                | 2.27, 3.29 |                      | 2.24                | 1.60, 2.87  |                      |
| None of the time (5)                           | 36 | 2.07                | 1.54, 2.60 |                      | 1.40                | 0.75, 2.06  |                      |
| <b>SF-36v2<sup>®</sup> item 9i<sup>c</sup></b> |    |                     |            | <0.001               |                     |             | <0.001               |
| All of the time (1)                            | 5  | 8.00                | 6.69, 9.31 |                      | 7.70                | 6.01, 9.38  |                      |
| Most of the time (2)                           | 36 | 5.26                | 4.73, 5.79 |                      | 4.34                | 3.66, 5.03  |                      |
| Some of the time (3)                           | 45 | 4.14                | 3.66, 4.61 |                      | 3.58                | 2.97, 4.19  |                      |
| A little of the time (4)                       | 44 | 2.66                | 2.21, 3.11 |                      | 2.08                | 1.50, 2.66  |                      |
| None of the time (5)                           | 11 | 1.21                | 0.35, 2.08 |                      | 0.94                | -0.18, 2.05 |                      |

|                      | NTDT-PRO T/W domain |         |            |                      | NTDT-PRO SoB domain |            |                      |
|----------------------|---------------------|---------|------------|----------------------|---------------------|------------|----------------------|
|                      | n                   | LS mean | 95% CI     | p value <sup>a</sup> | LS mean             | 95% CI     | p value <sup>a</sup> |
| PGI-S                |                     |         |            | <0.001               |                     |            | <0.001               |
| 0 to 2 (no symptoms) | 40                  | 1.33    | 0.95, 1.71 |                      | 1.06                | 0.51, 1.60 |                      |
| >2 to 4 (mild)       | 37                  | 3.70    | 3.31, 4.10 |                      | 2.83                | 2.27, 3.40 |                      |
| >4 to 6 (moderate)   | 44                  | 4.90    | 4.52, 5.29 |                      | 4.08                | 3.53, 4.63 |                      |
| >6 to 8 (severe)     | 19                  | 5.75    | 5.21, 6.30 |                      | 5.17                | 4.39, 5.96 |                      |
| >8 (very severe)     | 5                   | 7.70    | 6.67, 8.72 |                      | 7.43                | 5.96, 8.91 |                      |

<sup>a</sup>F-test comparing T/W and SoB domain scores across subgroups (ANCOVA).

<sup>b</sup>“Please select 1 answer [...] to indicate your response as it applies to the past 7 days”: item HI12, “I feel weak all over”; item An2, “I feel tired”.

“How much of the time during the past week did you...”: item 9e, “...have a lot of energy?”; item 9g, “...feel worn out?”; item 9i, “...feel tired?”

ANCOVA, analysis of covariance; CI, confidence interval; FACIT-F, Functional Assessment of Chronic Illness Therapy – Fatigue; FS, Fatigue Subscale; LS, least squares; NTDT-PRO, non-transfusion-dependent  $\beta$ -thalassaemia-patient-reported outcomes; PGI-S, Patient Global Impression of Severity; SF-36v2<sup>®</sup>, Short Form Health Survey version 2; SoB, Shortness of Breath; T/W, Tiredness/Weakness.

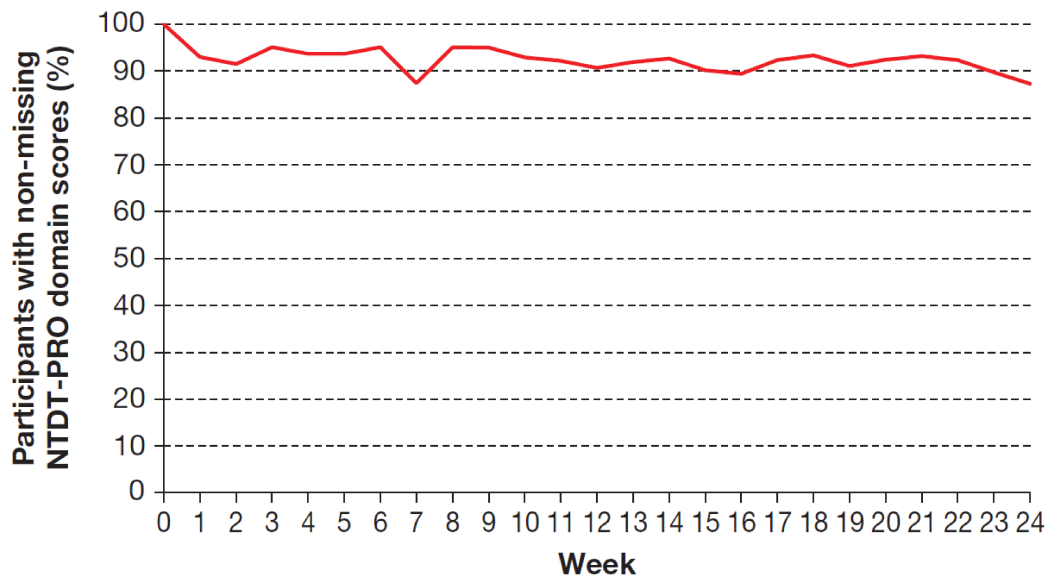

**Figure S1** Percentage of participants with non-missing weekly NTDT-PRO domain scores. The percentage for a given week was calculated as the number of participants with non-missing weekly NTDT-PRO domain scores divided by the number of participants who remained on-study. For all weeks, percentages were the same for both the T/W and SoB domains. NTDT-PRO, non-transfusion-dependent  $\beta$ -thalassaemia-patient-reported outcomes; SoB, Shortness of Breath; T/W, Tiredness/Weakness.
